# Supplementary material for: Insertion of carbon monoxide into an aldehyde CO double bond induced by an (η3-α-silabenzyl)carbonylmolybdenum complex
Source: Royal Society of Chemistry journal article supplement (doi:10.1039/c4ra02308k), 2014-01-01
Supplement: c4ra02308k1.pdf [file c4ra02308k1.pdf]

## Electronic Supplementary Information

### Insertion of carbon monoxide into an aldehyde C=O double bond induced by an ( $\eta^3$ - $\alpha$ -silabenzyl)carbonylmolybdenum complex

Yuto Kanno, Takashi Komuro and Hiromi Tobita\*

*Department of Chemistry, Graduate School of Science, Tohoku University, Sendai 980-8578, Japan*

#### Synthetic procedures and characterisation data

**General procedures.** All manipulations were carried out under argon in a glovebox. Hexane was dried using a Glass Contour solvent purification system (Nikko Hansen & Co., Ltd.) and degassed by three freeze-pump-thaw cycles. Toluene was dried using an MBRAUN solvent purification system, then was further dried over  $\text{CaH}_2$  and vacuum transferred. Pentane, benzene- $d_6$  and dichloromethane- $d_2$  were dried over  $\text{CaH}_2$  and vacuum transferred. 2-Methylpropanal and 2,2-dimethylpropanal were dried over  $\text{Na}_2\text{CO}_3$  and distilled under argon. All solvents and reagents were stored under argon over 4 Å molecular sieves in a glovebox.  $\text{Cp}^*\text{Mo}(\text{CO})_2\{\eta^3(\text{Si}, \text{C}, \text{C})\text{-Si}(p\text{-Tol})_3\}$  (**1**) was prepared according to the literature method.<sup>S1</sup>

**Physical measurements.**  $^1\text{H}$ ,  $^{13}\text{C}\{^1\text{H}\}$  and  $^{29}\text{Si}\{^1\text{H}\}$  NMR spectra were recorded on a Bruker AVANCE III 400 Fourier transform spectrometer. Chemical shifts were reported in parts per million. Coupling constants ( $J$ ) were given in Hz.  $^{29}\text{Si}\{^1\text{H}\}$  NMR measurements were performed using the DEPT pulse sequence. The residual proton ( $\text{C}_6\text{D}_5\text{H}$ , 7.15 ppm;  $\text{CDHCl}_2$ , 5.32 ppm) and the carbon resonances ( $\text{C}_6\text{D}_6$ , 128.0 ppm;  $\text{CD}_2\text{Cl}_2$ , 53.8 ppm) of deuterated solvents were used as internal references for  $^1\text{H}$  and  $^{13}\text{C}$  NMR chemical shifts, respectively. Aromatic proton and carbon are abbreviated as ArH and ArC, respectively.  $^{29}\text{Si}\{^1\text{H}\}$  NMR chemical shifts were referenced to  $\text{SiMe}_4$  (0 ppm) as an external standard.

The NMR data were collected at room temperature unless indicated otherwise. Infrared spectra were measured on a KBr pellet sample using a Horiba FT-720 spectrometer. High-resolution mass spectra (HRMS) were measured on a Bruker Daltonics solariX 9.4T spectrometer operating in the electrospray ionization (ESI) mode. Elemental analyses were carried out using a J-Science Lab JM11 microanalyzer. Measurement of mass spectra and elemental analyses were performed at the Research and Analytical Center for Giant Molecules, Tohoku University.

**Synthesis of  $\text{Cp}^*\text{Mo}(\text{CO})_2\{\eta^2(\text{C},\text{O})\text{-CH}(i\text{-Pr})\text{OSi}(p\text{-Tol})_3\}$  (**2**).** Complex **1** (25 mg, 0.042 mmol) was dissolved in toluene (0.5 mL) in a Schlenk tube. To the dark purple solution, 2-methylpropanal (4 mg, 0.05 mmol) was added by a syringe. The mixture was stirred at room temperature for 1 min. The colour of the solution changed to orange. After evaporation of volatiles, the residual oil was washed with hexane (2 mL) and was evaporated to dryness. Complex **2** (a 5 : 1 mixture of two diastereomers **2a** and **2b** in  $\text{CD}_2\text{Cl}_2$ ) was obtained as an orange powder in 83% yield (23 mg, 0.035 mmol); (found: C, 67.49; H, 6.84.  $\text{C}_{37}\text{H}_{44}\text{O}_3\text{SiMo}$  requires C, 67.25; H, 6.71%);  $\nu_{\text{max}}/\text{cm}^{-1}$  1909 s ( $\text{CO}_{\text{sym}}$ ), 1805 s ( $\text{CO}_{\text{asym}}$ );  $m/z$  (ESI, positive mode) 662.2106 ( $\text{M}^+$ .  $[\text{C}_{37}\text{H}_{44}\text{O}_3\text{SiMo}]^+$  requires 662.2108); NMR data for **2a**:  $\delta_{\text{H}}$  (400 MHz,  $\text{C}_6\text{D}_6$ , r.t.) 7.70 (d, 6H,  $J_{\text{HH}}$  7.8, ArH), 7.03 (6H, d,  $J_{\text{HH}}$  7.8, ArH), 3.49 (1H, d,  $J_{\text{HH}}$  8.7, C(H)CHMe<sub>2</sub>), 2.23–2.36 (1H, m, C(H)CHMe<sub>2</sub>), 2.05 (s, 9H,  $\text{C}_6\text{H}_4\text{Me}$ ), 1.68 (15H, s, Cp\*), 1.22 (3H, d,  $J_{\text{HH}}$  6.6, C(H)CHMe<sub>A</sub>Me<sub>B</sub>), 0.92 (3H, d,  $J_{\text{HH}}$  6.4, C(H)CHMe<sub>A</sub>Me<sub>B</sub>);  $\delta_{\text{H}}$  (400 MHz,  $\text{CD}_2\text{Cl}_2$ , 240 K) 7.34 (6H, d,  $J_{\text{HH}}$  7.6, ArH), 7.20 (6H, d,  $J_{\text{HH}}$  7.6, ArH), 3.16 (1H, d,  $J_{\text{HH}}$  9.2, C(H)(CHMe<sub>2</sub>)), 2.34 (9H, s,  $\text{C}_6\text{H}_4\text{Me}$ ), 1.65 (15H, s, Cp\*), 0.95 (3H, d,  $J_{\text{HH}}$  6.4, C(H)CHMe<sub>A</sub>Me<sub>B</sub>), 0.53 (3H, d,  $J_{\text{HH}}$  6.4, C(H)CHMe<sub>A</sub>Me<sub>B</sub>), the signal of C(H)CHMe<sub>2</sub> could not be assigned possibly due to the overlap with the Cp\* signal ( $\delta$  1.68) of **2a**;  $\delta_{\text{C}}$  (101 MHz,  $\text{CD}_2\text{Cl}_2$ , 240 K) 263.9, 252.5 (CO), 140.7, 135.6, 129.2, 128.6 (ArC), 104.5 ( $\text{C}_5\text{Me}_5$ ), 87.5 (C(H)CHMe<sub>2</sub>), 38.1 (C(H)CHCMe<sub>2</sub>), 25.2 (C(H)CHMe<sub>A</sub>Me<sub>B</sub>), 21.4 ( $\text{C}_6\text{H}_4\text{Me}$ ), 19.4 (C(H)CHMe<sub>A</sub>Me<sub>B</sub>), 10.8 ( $\text{C}_5\text{Me}_5$ );  $\delta_{\text{Si}}$  (79.5 Hz,  $\text{CD}_2\text{Cl}_2$ , 240 K) –0.2; NMR data for **2b**:  $\delta_{\text{H}}$  (400 MHz,  $\text{C}_6\text{D}_6$ , r.t.)

7.77 (6H, d,  $J_{\text{HH}}$  7.8, ArH), 7.06 (6H, d,  $J_{\text{HH}}$  7.8, ArH), 4.12 (1H, d,  $J_{\text{HH}}$  9.6, C(H)CHMe<sub>2</sub>), 1.78 (15H, s, Cp\*), 1.09 (3H, d,  $J_{\text{HH}}$  6.8, C(H)CHMe<sub>A</sub>Me<sub>B</sub>), 0.99 (3H, d,  $J_{\text{HH}}$  6.1, C(H)CHMe<sub>A</sub>Me<sub>B</sub>), the C<sub>6</sub>H<sub>4</sub>Me and C(H)CHMe<sub>2</sub> signals could not be assigned possibly due to overlap with <sup>1</sup>H signals of **2a**;  $\delta_{\text{H}}$  (400 MHz, CD<sub>2</sub>Cl<sub>2</sub>, 240 K) 7.41 (6H, d,  $J_{\text{HH}}$  7.6, ArH), 7.21 (6H, d,  $J_{\text{HH}}$  7.6, ArH), 3.44 (1H, d,  $J_{\text{HH}}$  9.6, C(H)CHMe<sub>2</sub>), 2.35 (9H, s, C<sub>6</sub>H<sub>4</sub>Me), 1.79 (15H, s, Cp\*), 0.92 (3H, d,  $J_{\text{HH}}$  6.4, C(H)CHMe<sub>A</sub>Me<sub>B</sub>), 0.73 (3H, d,  $J_{\text{HH}}$  6.4, C(H)CHMe<sub>A</sub>Me<sub>B</sub>), the signal of C(H)CHMe<sub>2</sub> could not be assigned possibly due to overlap with other <sup>1</sup>H signals of **2a** or **2b**;  $\delta_{\text{C}}$  (101 MHz, CD<sub>2</sub>Cl<sub>2</sub>, 240 K) 136.0 (ArC), 105.9 (C<sub>6</sub>H<sub>4</sub>Me), 11.0 (C<sub>5</sub>Me<sub>5</sub>), other signals for **2b** were not observed because their intensities were too weak; assignments of <sup>1</sup>H and <sup>13</sup>C signals were confirmed by <sup>1</sup>H–<sup>13</sup>C HSQC and <sup>1</sup>H–<sup>13</sup>C HMBC NMR spectra in CD<sub>2</sub>Cl<sub>2</sub> at 240 K.

**Synthesis of Cp\*Mo(CO)<sub>2</sub>{ $\eta^2$ (C,O)-CH(*t*-Bu)OSi(*p*-Tol)<sub>3</sub>} (3).** In a Schlenk tube, **1** (24 mg, 0.041 mmol) was dissolved in toluene (0.5 mL), and then 2,2-dimethylpropanal (5 mg, 0.06 mmol) was added. After the mixture was stirred at room temperature for 1 min, the resulting orange solution was evaporated to dryness. Recrystallization of the residual orange oil from hexane (2 mL) at –35 °C afforded **3** in 76% yield (21 mg, 0.031 mmol) as an orange powder; (found: C, 67.96; H, 6.87. C<sub>38</sub>H<sub>46</sub>O<sub>3</sub>SiMo requires C, 67.64; H, 6.87%);  $\nu_{\text{max}}/\text{cm}^{-1}$  1927 s (CO<sub>sym</sub>), 1803 s (CO<sub>asym</sub>);  $\delta_{\text{H}}$  (400 MHz, C<sub>6</sub>D<sub>6</sub>, r.t.) 7.77 (6H, d,  $J_{\text{HH}}$  8.0, ArH), 7.02 (6H, d,  $J_{\text{HH}}$  8.0, ArH), 3.94 (1H, s, C(H)CMe<sub>3</sub>), 2.05 (9H, s, C<sub>6</sub>H<sub>4</sub>Me), 1.67 (15H, s, Cp\*), 1.12 (9H, s, C(H)CMe<sub>3</sub>);  $\delta_{\text{H}}$  (400 MHz, CD<sub>2</sub>Cl<sub>2</sub>, 240 K) 7.44 (6H, d,  $J_{\text{HH}}$  8.0, ArH), 7.21 (6H, d,  $J_{\text{HH}}$  8.0, ArH), 3.62 (1H, s, C(H)CMe<sub>3</sub>), 2.35 (9H, s, C<sub>6</sub>H<sub>4</sub>Me), 1.60 (15H, s, Cp\*), 0.71 (9H, s, C(H)CMe<sub>3</sub>);  $\delta_{\text{C}}$  (101 MHz, CD<sub>2</sub>Cl<sub>2</sub>, 240 K) 265.2, 254.9 (CO), 140.8, 136.2, 129.1, 128.6 (ArC), 104.7 (C<sub>5</sub>Me<sub>5</sub>), 93.8 (C(H)CMe<sub>3</sub>), 36.7 (C(H)CMe<sub>3</sub>), 28.2 (C(H)CMe<sub>3</sub>), 21.4 (C<sub>6</sub>H<sub>4</sub>Me), 10.7 (C<sub>5</sub>Me<sub>5</sub>); assignments of <sup>1</sup>H and <sup>13</sup>C signals were confirmed by <sup>1</sup>H–<sup>13</sup>C HSQC and <sup>1</sup>H–<sup>13</sup>C HMBC NMR spectra in CD<sub>2</sub>Cl<sub>2</sub> at 240 K;  $\delta_{\text{Si}}$  (79.5 MHz, CD<sub>2</sub>Cl<sub>2</sub>, 240 K) –2.5; *m/z* (ESI, positive mode) 676.2265 (M<sup>+</sup>. [C<sub>38</sub>H<sub>46</sub>O<sub>3</sub>SiMo]<sup>+</sup> requires 676.2265).

**NMR monitoring of a thermal reaction of 1 with 2,2-dimethylpropanal: formation of  $\eta^3$ -oxaallyl complex 4.** Complex **1** (5 mg, 9  $\mu$ mol) and  $\text{Cp}_2\text{Fe}$  (internal standard, less than 1 mg;  $\text{Cp} = \eta^5\text{-C}_5\text{H}_5$ ) were dissolved in benzene- $d_6$  (0.6 mL). The solution was transferred into an NMR tube with a J-Young Teflon valve (5 mm o.d.). A  $^1\text{H}$  NMR spectrum of the mixture was measured to determine the intensity ratio of the signals of **1** and  $\text{Cp}_2\text{Fe}$ . 2,2-Dimethylpropanal (1 mL,  $d = 0.793$  g/mL, 9  $\mu$ mol) was added to the solution. The colour of the mixture changed from dark-purple to orange instantaneously. The reaction was monitored by  $^1\text{H}$  NMR spectroscopy at room temperature. After 10 min, complex **1** was completely consumed, and three-membered-ring complex **3** and  $\eta^3$ -oxaallyl complex **4** were formed in the NMR yields of 68% and 11%, respectively. At this stage, the colour of the mixture was orange. Then, the intensities of the signals of **3** decreased slowly, and those of the signals of **4** increased concurrently. After 4 h, **3** completely disappeared and **4** was formed in 40% NMR yield as the main product. The colour of the reaction mixture changed to dark red. The products **3** and **4** were identified by comparing the  $^1\text{H}$  NMR spectra with those of the authentic samples synthesised by the above-mentioned (for **3**) and after-mentioned (for **4**) procedures.

**NMR monitoring of a thermal reaction of 3: formation of  $\eta^3$ -oxaallyl complex 4.** A solution of isolated **3** (5 mg, 7  $\mu$ mol) and  $\text{Cp}_2\text{Fe}$  (internal standard, less than 1 mg) in benzene- $d_6$  (0.5 mL) was transferred into an NMR tube with a J-Young Teflon valve (5 mm o.d.). After 15 min, a  $^1\text{H}$  NMR spectrum of the mixture was measured to determine the intensity ratio of the signals of **3** and  $\text{Cp}_2\text{Fe}$ . At this stage, the signals of complex **4** were observed besides those of **3** (**3** : **4** = 1 : 0.25). The reaction was monitored by  $^1\text{H}$  NMR spectroscopy at room temperature. As the intensities of the signals of **4** increased, those of **3** decreased. After 5 h, the signals of complex **3** disappeared, and reaction was completed. Complex **4** was formed in 41% NMR yield based on the conversion of complex **3** in the reaction mixture after 15 min. The product **4** was identified by comparing the  $^1\text{H}$  and

$^{29}\text{Si}\{^1\text{H}\}$  NMR spectra with those of the authentic sample synthesised by the after-mentioned procedure.

**Synthesis of  $\text{Cp}^*\text{Mo}(\text{CO})_2[\eta^3(\text{O},\text{C},\text{C})\text{-OC}\{\text{OSi}(p\text{-Tol})_3\}\text{CH}(t\text{-Bu})]$  (**4**).** To a toluene (2.5 mL) solution of **1** (25 mg, 0.042 mmol) in a Schlenk tube was added 2,2-dimethylpropanal (4 mg, 0.05 mmol). The mixture was stirred at room temperature for 5 h, and then the resulting dark red solution was evaporated under vacuum. After the residual dark red oil was dissolved in pentane (0.5 mL), the solution was cooled at  $-35\text{ }^\circ\text{C}$ . Complex **4** was obtained as reddish purple crystals in 40% yield (12 mg, 0.017 mmol); (Found: C, 66.86; H, 6.73.  $\text{C}_{39}\text{H}_{46}\text{O}_4\text{SiMo}$  requires C, 66.65; H, 6.60%);  $\nu_{\text{max}}/\text{cm}^{-1}$  1932 s ( $\text{CO}_{\text{sym}}$ ), 1844 s ( $\text{CO}_{\text{asym}}$ );  $\delta_{\text{H}}$  (400 MHz,  $\text{C}_6\text{D}_6$ ) 7.82 (6H, d,  $J_{\text{HH}}$  8.0, ArH), 7.08 (6H, d,  $J_{\text{HH}}$  8.0, ArH), 2.30 (1H, s,  $\text{OC}\{\text{OSi}(p\text{-Tol})_3\}\text{C}(H)\text{CMe}_3$ ), 2.08 (9H, s,  $\text{C}_6\text{H}_4\text{Me}$ ), 1.55 [9H, s,  $\text{OC}\{\text{OSi}(p\text{-Tol})_3\}\text{C}(H)\text{CMe}_3$ ], 1.54 (15H, s,  $\text{Cp}^*$ );  $\delta_{\text{C}}$  (101 MHz,  $\text{C}_6\text{D}_6$ ) 257.7, 251.0 (CO), 155.0 [ $\text{OC}\{\text{OSi}(p\text{-Tol})_3\}\text{C}(H)\text{CMe}_3$ ], 140.3, 136.6, 130.2, 128.9 (ArC), 106.6 ( $\text{C}_5\text{Me}_5$ ), 63.7 [ $\text{OC}\{\text{OSi}(p\text{-Tol})_3\}\text{C}(H)\text{CMe}_3$ ], 34.4 [ $\text{OC}\{\text{OSi}(p\text{-Tol})_3\}\text{C}(H)\text{CMe}_3$ ], 31.4 [ $\text{OC}\{\text{OSi}(p\text{-Tol})_3\}\text{C}(H)\text{CMe}_3$ ], 21.5 ( $\text{C}_6\text{H}_4\text{Me}$ ), 10.2 ( $\text{C}_5\text{Me}_5$ ); assignments of  $^1\text{H}$  and  $^{13}\text{C}$  signals were confirmed by  $^1\text{H}$ - $^{13}\text{C}$  HSQC and  $^1\text{H}$ - $^{13}\text{C}$  HMBC NMR spectra;  $\delta_{\text{Si}}$  (79.5 MHz,  $\text{C}_6\text{D}_6$ )  $-8.1$ ;  $m/z$  (ESI, positive mode) 704.2214 ( $\text{M}^+$ . [ $\text{C}_{39}\text{H}_{46}\text{O}_4\text{SiMo}$ ] $^+$  requires 704.2214).

**NMR monitoring of a reaction of **1** with 2,2-dimethylpropanal under a CO atmosphere.** Complex **1** (5 mg, 9  $\mu\text{mol}$ ) and  $\text{Cp}_2\text{Fe}$  (internal standard, less than 1 mg) were dissolved in benzene- $d_6$  (0.6 mL). The solution was transferred into an NMR tube with a J-Young Teflon valve (5 mm o.d.). A  $^1\text{H}$  NMR spectrum of the mixture was measured to determine the intensity ratio of the signals of **1** and  $\text{Cp}_2\text{Fe}$ . 2,2-Dimethylpropanal (1  $\mu\text{L}$ ,  $d = 0.793\text{ g/mL}$ , 9  $\mu\text{mol}$ ) was added to the solution. The colour of the mixture changed to orange instantaneously. After standing the tube for 5 min at room temperature, the  $^1\text{H}$  NMR signals of **3** were observed (78% NMR yield based on **1**). The NMR tube was then evacuated briefly to degas and was charged with 1 atm of CO gas. This procedure was repeated three times, and then the tube was shaken well. Conversion of **3** at room

temperature was monitored by  $^1\text{H}$  NMR spectroscopy. Complex **3** was completely consumed in the course of 13 h, and the colour of the solution changed to dark red. Complex **4** was formed as the main product in 75% NMR yield based on **1**. The NMR yields of **3** and **4** were determined by comparison of the intensities of the  $\text{Cp}^*$  signals of these complexes with that of the signal of  $\text{Cp}_2\text{Fe}$ . The products **3** and **4** were identified by comparing the corresponding  $^1\text{H}$  NMR spectra with those of the authentic samples synthesised by the above-mentioned procedures.

**X-ray crystal structure determination.** X-ray quality single crystals of **2a** (an orange plate) and **4** (a reddish-purple plate) were obtained from hexane (for **2a**) or pentane (for **4**) at  $-35\text{ }^\circ\text{C}$ . Intensity data for the analysis were collected on a Bruker SMART APEXII CCD diffractometer with  $\text{Cu K}\alpha$  radiation ( $\lambda = 1.54178\text{ \AA}$ ) using Bruker Helios multilayered confocal mirror monochromator under a cold nitrogen stream ( $T = 90\text{ K}$ ) (for **2a**) or on a Rigaku RAXIS-RAPID imaging plate diffractometer with graphite-monochromated  $\text{Mo K}\alpha$  radiation ( $\lambda = 0.71069\text{ \AA}$ ) under a cold nitrogen stream ( $T = 150\text{ K}$ ) (for **4**). An empirical absorption correction (for **2a**) or a numerical absorption correction (for **4**) was applied to the collected reflections. We could not obtain a sufficient amount of reflections for **2a**: Data completeness to  $2\theta = 139.42^\circ$  is 88.0%. This is caused by the gradual degradation of crystallinity of the sample under X-ray irradiation. The structure of **4** was solved as a racemic twin [Flack parameter: 0.22(3)] in the acentric space group  $P2_1$ . The structures were solved by direct methods using the SHELXS-97 program<sup>S2</sup> and refined by full matrix least-squares techniques on all  $F^2$  data with SHELXL-97.<sup>S2</sup> Anisotropic refinement was applied to all non-hydrogen atoms. All hydrogen atoms were placed at calculated positions. All calculations were carried out using Yadokari-XG 2009.<sup>S3</sup> Selected crystallographic data for **2a** and **4** are listed in Table S1. ORTEP drawings of two crystallographically independent molecules of each of **2a** and **4** are depicted in Figs. S1 and S2, respectively. CCDC reference numbers: 990556 (**2a**) and 990557 (**4**).

**Table S1** Crystallographic data for Cp\*Mo(CO)<sub>2</sub>{ $\eta^2$ (C, O)-CH(*i*-Pr)OSi(*p*-Tol)<sub>3</sub>} (**2a**) and Cp\*Mo(CO)<sub>2</sub>[ $\eta^3$ (O, C, C)-OC{OSi(*p*-Tol)<sub>3</sub>}CH(*t*-Bu)] (**4**).

| compound                                                      | <b>2a</b>                                           | <b>4</b>                                            |
|---------------------------------------------------------------|-----------------------------------------------------|-----------------------------------------------------|
| formula                                                       | C <sub>37</sub> H <sub>44</sub> O <sub>3</sub> SiMo | C <sub>39</sub> H <sub>46</sub> O <sub>4</sub> SiMo |
| formula weight                                                | 660.75                                              | 702.79                                              |
| crystal system                                                | triclinic                                           | monoclinic                                          |
| crystal size/mm <sup>3</sup>                                  | 0.11 × 0.06 × 0.04                                  | 0.20 × 0.15 × 0.08                                  |
| space group                                                   | <i>P</i> (No. 2)                                    | <i>P</i> 2 <sub>1</sub> (No. 4)                     |
| <i>a</i> /Å                                                   | 8.6566(3)                                           | 12.8069(3)                                          |
| <i>b</i> /Å                                                   | 10.9696(4)                                          | 13.1036(4)                                          |
| <i>c</i> /Å                                                   | 35.7255(11)                                         | 21.5568(7)                                          |
| $\alpha$ /°                                                   | 95.4889(13)                                         |                                                     |
| $\beta$ /°                                                    | 92.2032(14)                                         | 90.7174(4)                                          |
| $\gamma$ /°                                                   | 97.1362(15)                                         |                                                     |
| <i>V</i> /Å <sup>3</sup>                                      | 3346.4(2)                                           | 3617.30(18)                                         |
| <i>Z</i>                                                      | 4                                                   | 4                                                   |
| <i>D</i> <sub>calcd</sub> /g cm <sup>-3</sup>                 | 1.312                                               | 1.290                                               |
| <i>F</i> (000)                                                | 1384                                                | 1472                                                |
| $\mu$ (Cu-K $\alpha$ or Mo-K $\alpha$ )/mm <sup>-1</sup>      | 3.806                                               | 0.433                                               |
| reflections collected                                         | 31297                                               | 51709                                               |
| unique reflections ( <i>R</i> <sub>int</sub> )                | 11121 (0.0239)                                      | 15836 (0.1025)                                      |
| refined parameters                                            | 777                                                 | 834                                                 |
| <i>R</i> 1, <i>wR</i> 2 (all data)                            | 0.0740, 0.1674                                      | 0.0853, 0.1364                                      |
| <i>R</i> 1, <i>wR</i> 2 [ <i>I</i> > 2 $\sigma$ ( <i>I</i> )] | 0.0732, 0.1671                                      | 0.0681, 0.1279                                      |
| GOF                                                           | 1.361                                               | 1.147                                               |
| Largest residual peak, hole/e Å <sup>-3</sup>                 | 1.863, -1.573                                       | 0.709, -0.986                                       |

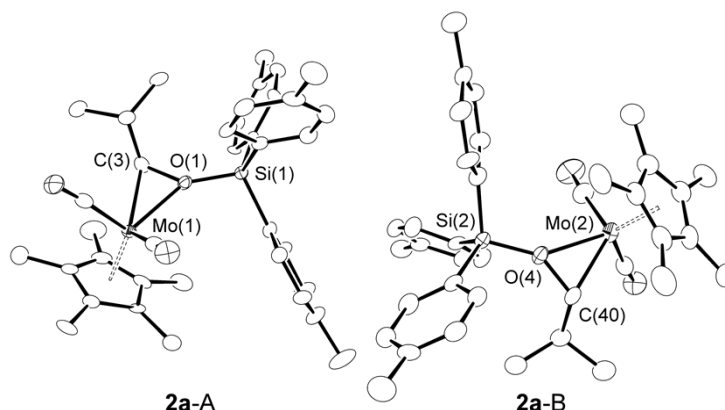

**Fig. S1** ORTEP drawing of two crystallographically independent molecules of  $\text{Cp}^*\text{Mo}(\text{CO})_2\{\eta^2(\text{C},\text{O})\text{-CH}(i\text{-Pr})\text{OSi}(p\text{-Tol})_3\}$  (**2a**), i.e., molecules **2a-A** and **2a-B**, in the asymmetric unit. Thermal ellipsoids are drawn at the 50% probability level, and all hydrogen atoms are omitted for clarity. Selected interatomic distances (Å) and angles (°) for molecule **2a-A**: Mo(1)–O(1) 2.175(4), Mo(1)–C(3) 2.167(6), O(1)–C(3) 1.434(7), O(1)–Mo(1)–C(3) 38.56(19); for molecule **2a-B**: Mo(2)–O(4) 2.169(4), Mo(2)–C(40) 2.160(7), O(4)–C(40) 1.450(8), O(4)–Mo(2)–C(40) 39.1(2).

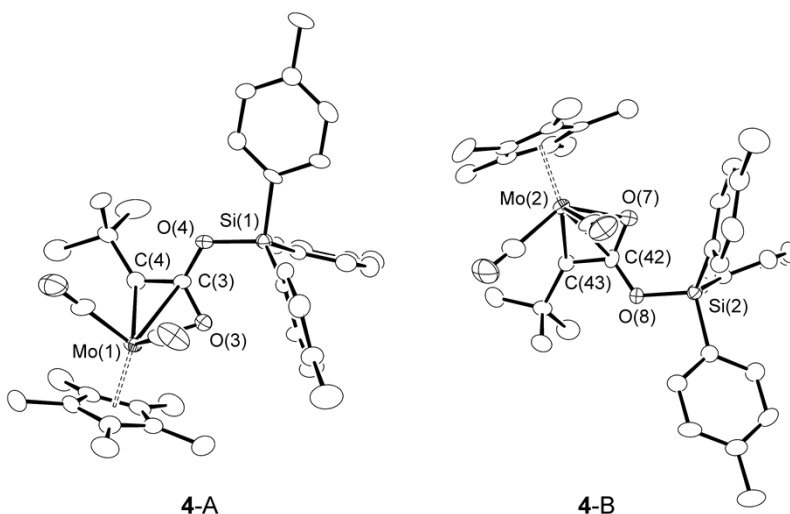

**Fig. S2** ORTEP drawing of two crystallographically independent molecules of  $\text{Cp}^*\text{Mo}(\text{CO})_2[\eta^3(\text{O},\text{C},\text{C})\text{-OC}\{\text{OSi}(p\text{-Tol})_3\}\text{CH}(t\text{-Bu})]$  (**4**), i.e., molecules **4-A** and **4-B**, in the asymmetric unit. Thermal ellipsoids are drawn at the 50% probability level, and all hydrogen atoms are omitted for clarity. Selected interatomic distances (Å) and angles (°) for molecule **4-A**: Mo(1)–O(3) 2.186(4), Mo(1)–C(3) 2.396(5), Mo(1)–C(4) 2.343(6), O(3)–C(3) 1.284(7), O(4)–C(3) 1.355(7), C(3)–C(4) 1.403(9), O(3)–Mo(1)–C(4) 61.27(18); for molecule **4-B**: Mo(2)–O(7) 2.185(4), Mo(2)–C(42) 2.402(5), Mo(2)–C(43) 2.370(6), O(7)–C(42) 1.277(7), O(8)–C(42) 1.333(7), C(42)–C(43) 1.420(8), O(7)–Mo(2)–C(43) 61.23(17).

## References

- S1 T. Komuro, Y. Kanno and H. Tobita, *Organometallics*, 2013, **32**, 2795.
- S2 G. M. Sheldrick, *Acta Crystallogr.*, 2008, **A64**, 112.
- S3 (a) K. Wakita, *Yadokari-XG, Software for Crystal Structure Analyses*, 2001; (b) *Yadokari-XG 2009, Software for Crystal Structure Analyses*. See: C. Kabuto, S. Akine, T. Nemoto and E. Kwon, *J. Cryst. Soc. Jpn.*, 2009, **51**, 218.
